# Supplementary material for: Variable Pathogenicity Determines Individual Lifespan in Caenorhabditis elegans
Source: PubMed Central journal article supplement (PMC3077391; doi:10.1371/journal.pgen.1002047), 2011-04-14

gene name

expression

*daf-16*

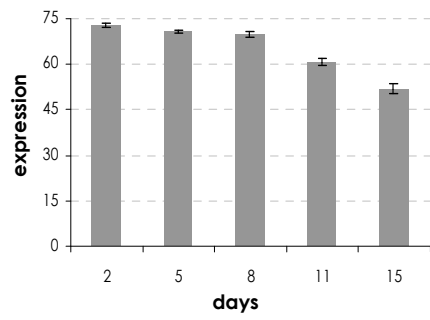

*myo-3*

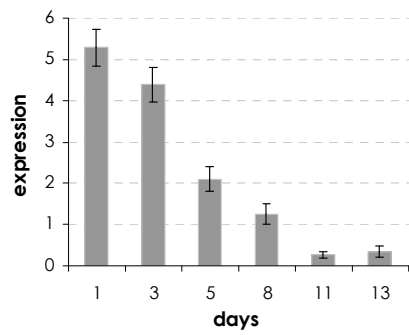

*unc-54*

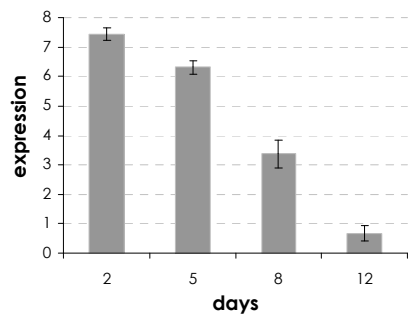

gene name

expression

*pha-4*

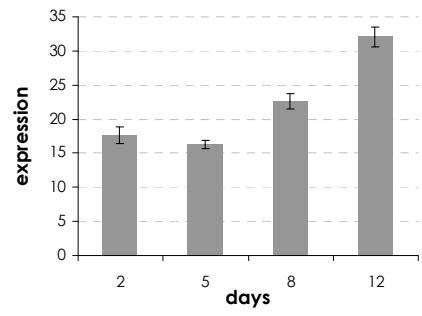

*C26B9.5*

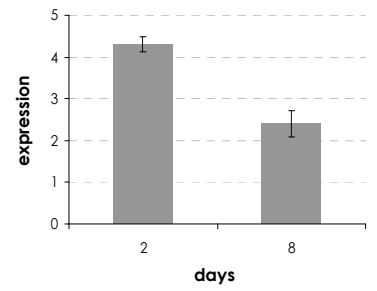

lipofuscin

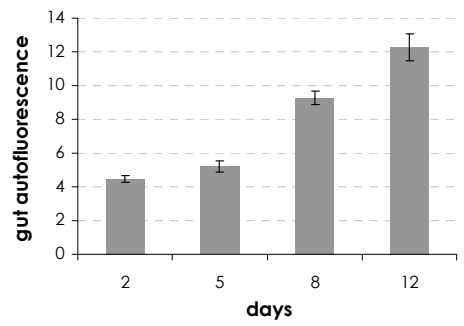

Supplement: pgen.1002047.s001.pdf [file pgen.1002047.s001.pdf]
