# Supplementary material for: Variable Pathogenicity Determines Individual Lifespan in Caenorhabditis elegans
Source: PubMed Central journal article supplement (PMC3077391; doi:10.1371/journal.pgen.1002047), 2011-04-14
Supplement: pgen.1002047.s003.pdf [file pgen.1002047.s003.pdf]

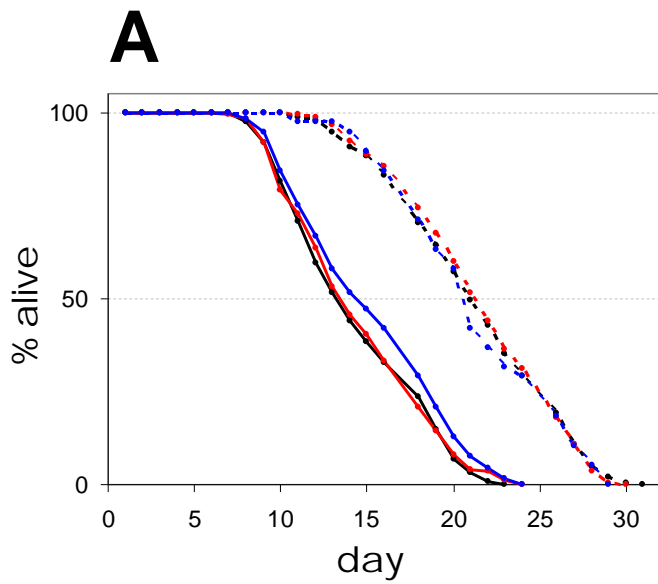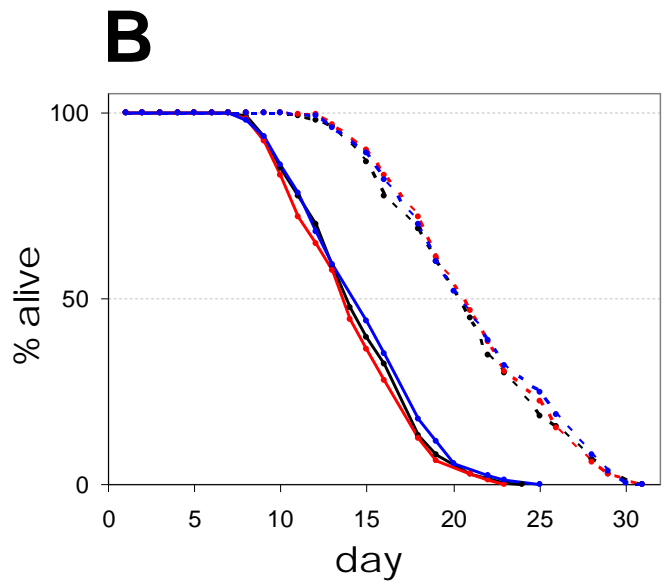

Control (*E. coli*)       Control (*B. subtilis*)  
 Line #1 (*E. coli*)       Line #1 (*B. subtilis*)  
 Line #2 (*E. coli*)       Line #2 (*B. subtilis*)

|                     | <i>sod-3</i> plasmid concentration 5 ng/μl |         |         |                    |         |         | <i>sod-3</i> plasmid concentration 40 ng/μl |         |         |                    |         |         |
|---------------------|--------------------------------------------|---------|---------|--------------------|---------|---------|---------------------------------------------|---------|---------|--------------------|---------|---------|
|                     | <i>E. coli</i>                             |         |         | <i>B. subtilis</i> |         |         | <i>E. coli</i>                              |         |         | <i>B. subtilis</i> |         |         |
|                     | control                                    | line #1 | line #2 | control            | line #1 | line #2 | control                                     | line #1 | line #2 | control            | line #1 | line #2 |
| n                   | 144                                        | 173     | 186     | 155                | 178     | 38      | 188                                         | 189     | 171     | 186                | 174     | 172     |
| median lifespan     | 13.2                                       | 13.4    | 14.3    | 21.0               | 21.2    | 20.5    | 13.8                                        | 13.6    | 14.2    | 20.3               | 20.4    | 20.6    |
| lifespan difference |                                            | 1.5%    | 8.3%    |                    | 1.0%    | -2.4%   |                                             | -1.5%   | 2.9%    |                    | 0.5%    | 1.5%    |
| p value (log rank)  |                                            | >0.05   | >0.05   |                    | >0.05   | >0.05   |                                             | >0.05   | >0.05   |                    | >0.05   | >0.05   |
