# Supplementary material for: Variable Pathogenicity Determines Individual Lifespan in Caenorhabditis elegans
Source: PubMed Central journal article supplement (PMC3077391; doi:10.1371/journal.pgen.1002047), 2011-04-14
Supplement: pgen.1002047.s004.pdf [file pgen.1002047.s004.pdf]

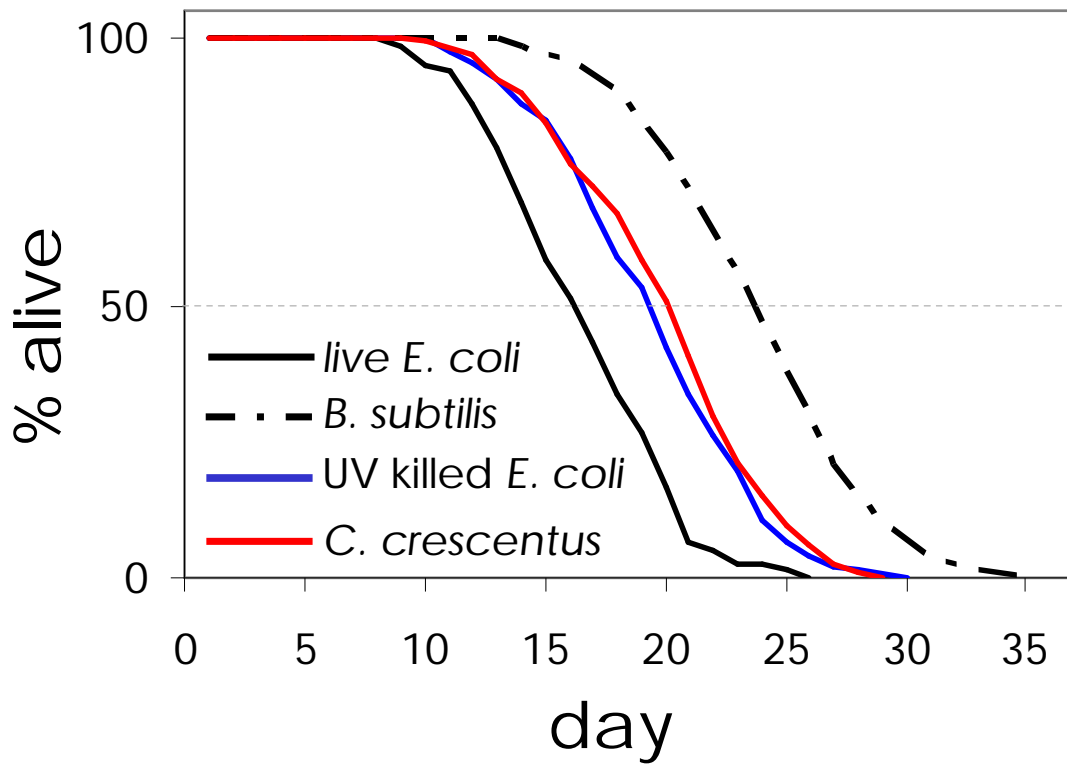

|                             | <u>live <i>E. coli</i></u> | <u>UV killed <i>E. coli</i></u> | <u><i>C. crescentus</i></u> | <u><i>B. subtilis</i></u> |
|-----------------------------|----------------------------|---------------------------------|-----------------------------|---------------------------|
| n                           | 207                        | 232                             | 145                         | 116                       |
| median lifespan (days)      | 16.3                       | 19.3                            | 20.0                        | 23.9                      |
| median lifespan difference* |                            | 18.4%                           | 22.7%                       | 46.6%                     |
| p. value (log. rank)*       |                            | <0.001                          | <0.001                      | <0.001                    |

\* with respect to live *E. coli*
