# Supplementary material for: Variable Pathogenicity Determines Individual Lifespan in Caenorhabditis elegans
Source: PubMed Central journal article supplement (PMC3077391; doi:10.1371/journal.pgen.1002047), 2011-04-14

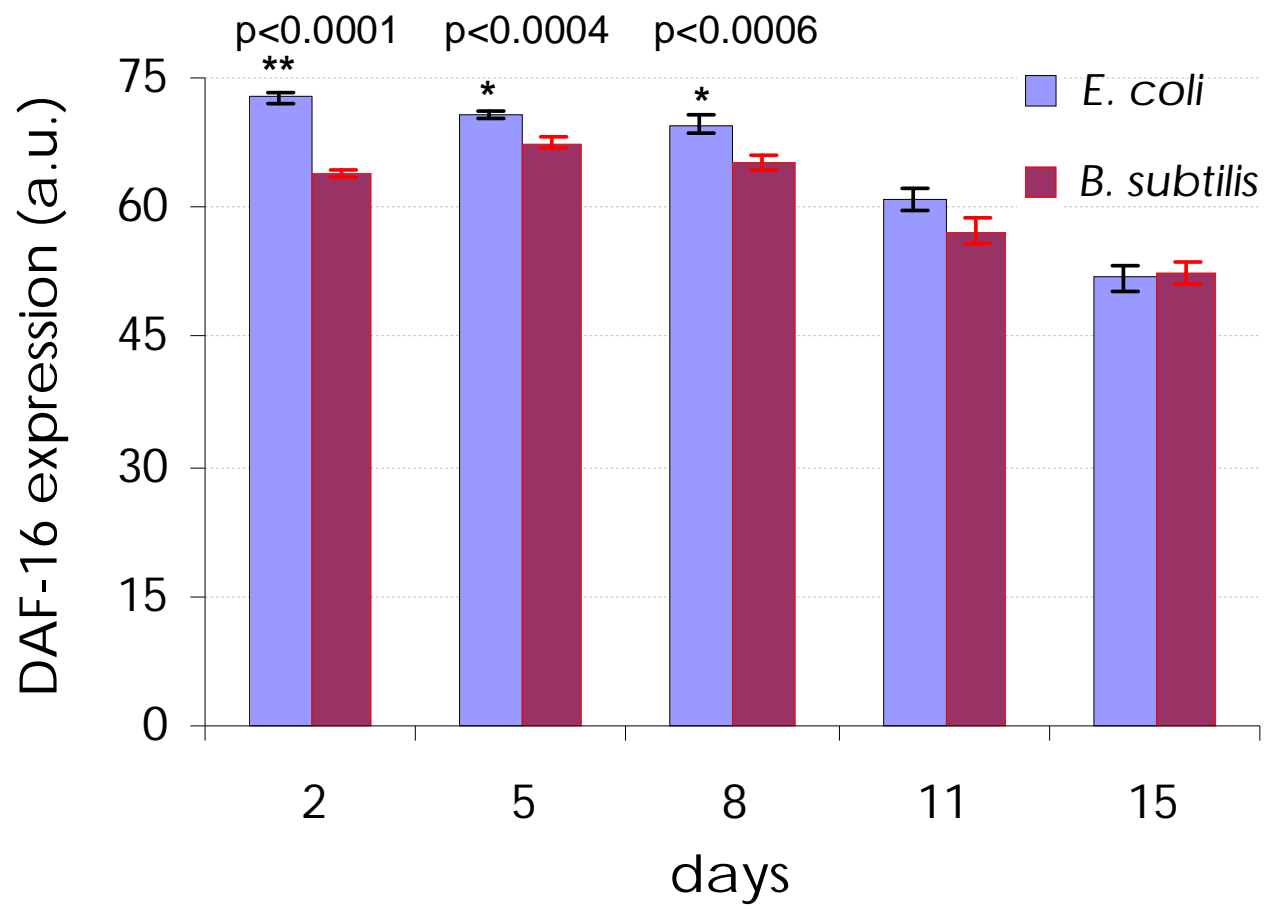

Supplement: pgen.1002047.s008.pdf [file pgen.1002047.s008.pdf]
