# Supplementary material for: Variable Pathogenicity Determines Individual Lifespan in Caenorhabditis elegans
Source: PubMed Central journal article supplement (PMC3077391; doi:10.1371/journal.pgen.1002047), 2011-04-14

**A**

| head      | head      | head         |
|-----------|-----------|--------------|
| HIGH      | LOW       | INTERMEDIATE |
| intestine | intestine | intestine    |
| LOW       | HIGH      | INTERMEDIATE |

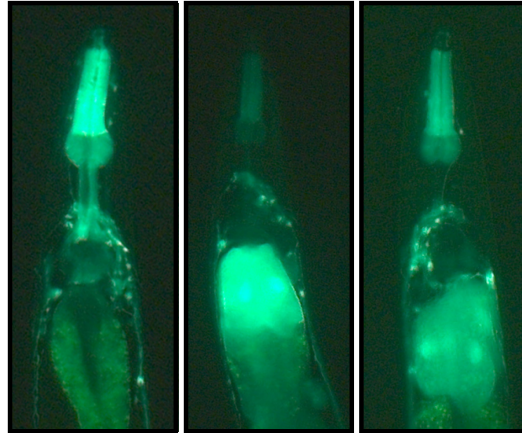**B**

INTESTINE

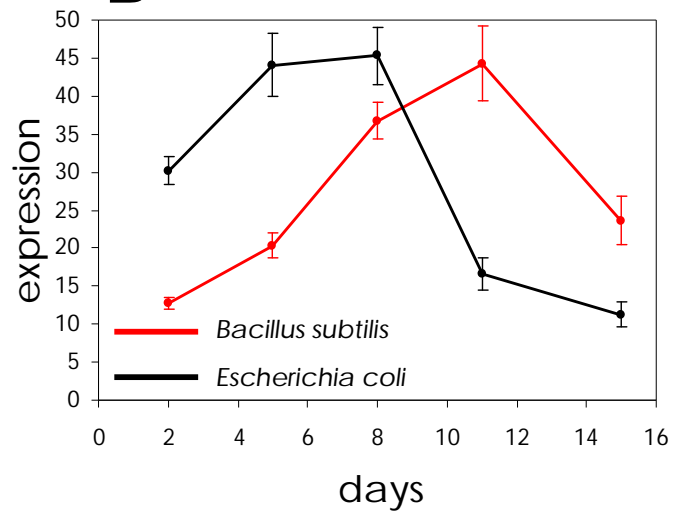**C**

HEAD

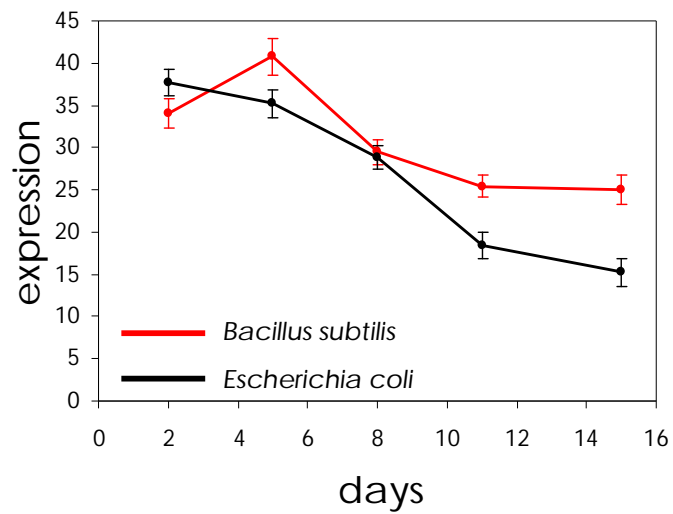

Supplement: pgen.1002047.s009.pdf [file pgen.1002047.s009.pdf]
