# Supplementary material for: Variable Pathogenicity Determines Individual Lifespan in Caenorhabditis elegans
Source: PubMed Central journal article supplement (PMC3077391; doi:10.1371/journal.pgen.1002047), 2011-04-14
Supplement: pgen.1002047.s011.pdf [file pgen.1002047.s011.pdf]

Variability in *sod-3* abundance (SD/mean)

---

|                    | <u>day=8</u> | <u>day=12</u> | <u>day=14</u> |
|--------------------|--------------|---------------|---------------|
| <i>E. coli</i>     | 0.36         | 0.63          | 0.64          |
| <i>B. subtilis</i> | 0.21         | 0.24          | 0.28          |
