# Supplementary material for: Variable Pathogenicity Determines Individual Lifespan in Caenorhabditis elegans
Source: PubMed Central journal article supplement (PMC3077391; doi:10.1371/journal.pgen.1002047), 2011-04-14
Supplement: pgen.1002047.s012.pdf [file pgen.1002047.s012.pdf]

|                      | <u><i>B. subtilis</i></u> | <u><i>B. subtilis</i><br/>→ <i>E. coli</i></u> | <u><i>E. coli</i></u> | <u><i>E. coli</i> →<br/><i>B. subtilis</i></u> |
|----------------------|---------------------------|------------------------------------------------|-----------------------|------------------------------------------------|
| n                    | 91                        | 106                                            | 128                   | 99                                             |
| median lifespan      | 24.1                      | 22.8                                           | 15.9                  | 18.2                                           |
| lifespan differences |                           | -5.4% *                                        |                       | 14.5% **                                       |
|                      |                           | 25.3% ***                                      |                       |                                                |

\* median lifespan difference with respect to worms kept solely on *B. subtilis* (p<0.0025 (log rank))

\*\* median lifespan difference with respect to worms kept solely on *E. coli* (p<0.0023 (log rank))

\*\*\* median lifespan difference with respect to worms kept on *E. coli* and then shifted to *B. subtilis* at day 8 (p<0.0001 (log rank))
