# Supplementary material for: Variable Pathogenicity Determines Individual Lifespan in Caenorhabditis elegans
Source: PLOS journal article supplement (doi:10.1371/journal.pgen.1002047), 2011-04-14
Supplement: S10 (10.1371/journal.pgen.1002047.s010) [file journal.pgen.1002047.s010]

|                                                                   | Experiment #1 (n=71) |                      |                      | Experiment #2 (n=69) |                      |                      |
|-------------------------------------------------------------------|----------------------|----------------------|----------------------|----------------------|----------------------|----------------------|
|                                                                   | <b>day=2</b>         | <b>day=5</b>         | <b>day=9</b>         | <b>day=2</b>         | <b>day=5</b>         | <b>day=9</b>         |
| <i>sod-3</i> expression and lifespan correlation (r) <sup>a</sup> | 0.23                 | 0.34                 | 0.55                 | 0.02                 | 0.32                 | 0.52                 |
| p value <sup>b</sup>                                              | 0.02                 | 1.7x10 <sup>-3</sup> | 3.0x10 <sup>-7</sup> | 0.43                 | 4.2x10 <sup>-3</sup> | 4.4x10 <sup>-6</sup> |
| <i>sod-3</i> expression variability <sup>c</sup>                  | 0.14                 | 0.19                 | 0.24                 | 0.21                 | 0.22                 | 0.42                 |

<sup>a</sup> Pearson correlation coefficient between *sod-3* expression and lifespan

<sup>b</sup> One tailed p-value calculated for correlation significance

<sup>c</sup> Expression variability is defined as the standard deviation divided by the average expression
